# Supplementary material for: Alanine Aminotransferase and Directly Measured Insulin Sensitivity in a Multiethnic Cohort
Source: Oxford University Press journal article supplement (doi:10.2337/dc07-0086), 2007-06-27
Supplement: dc070086-sup-onlineappendix1.doc [file dc070086-sup-onlineappendix1.doc]

**Online appendix table 1. Spearman correlation analysis of associations of liver enzymes and other metabolic and anthropometric variables with insulin sensitivity in non-diabetic subjects, the IRAS study.**

**___________________________________________________________________________________________________________**

Variable unadjusted adjusted for age, sex, ethnicity, alcohol

_____________________________________ _____________________________________

SI insulin waist SI insulin waist

___________________________________________________________________________________________________________

# ALT -0.28 0.35 0.34 -0.30 0.36 0.26

AST -0.18 0.22 0.17 -0.18 0.21 0.13

Alkaline phosphatase -0.21 0.19 0.15 -0.16 0.16 0.16

# BMI -0.54 0.53 0.78 -0.54 0.53 0.86

# Waist -0.54 0.52 - -0.57 0.55 -

Fasting glucose -0.34 0.37 0.42 -0.35 0.39 0.38

Fasting insulin -0.68 - 0.52 -0.67 - 0.55

Triglyceride -0.30 0.33 0.30 -0.28 0.33 0.26

HDL 0.29 -0.33 -0.38 0.29 -0.32 -0.28

CRP -0.39 0.34 0.33 -0.38 0.34 0.43

# Age -0.07 -0.04 0.03 - - -

__________________________________________________________________________________________________________________

see table 1 for abbreviations and units.

*all p<0.0001 except those for age and SI (p=0.02), age and insulin (p=0.16) and age and waist (p=0.28)
